# Supplementary material for: Efficacy of Saccharothrix algeriensis NRRL B-24137 to suppress Fusarium oxysporum f.sp. vasinfectum induced wilt disease in cotton
Source: PeerJ. 2023 Feb 6;11:e14754. doi: 10.7717/peerj.14754 (PMC9910192; doi:10.7717/peerj.14754)
Supplement: Supplemental Information 2 [file peerj-11-14754-s002.xlsx]

## Sheet: b1 (2)
Disease Severity (%)	UN Control		1.03	C
	FOV	81.4667	2.00206
	SA+FOV	23.6667	1.98006
	SA	0
