# Supplementary material for: Efficacy of Saccharothrix algeriensis NRRL B-24137 to suppress Fusarium oxysporum f.sp. vasinfectum induced wilt disease in cotton
Source: PeerJ. 2023 Feb 6;11:e14754. doi: 10.7717/peerj.14754 (PMC9910192; doi:10.7717/peerj.14754)
Supplement: Supplemental Information 3 — FOV induced wilt in cotton plants reduction using Sa. algeriensis NRRL B-24137 (SA). [file peerj-11-14754-s003.xlsx]

## Sheet: b2b
	Time (weeks)	FOV	FOV+SA	se1	se2
Disease Severity (%)	0	1.66667	0	1.66667	0
Disease incidence (%)	1	11.6667	3.33333	1.66667	1.66667
Disease incidence (%)	2	18.3333	8.33333	1.66667	1.66667
Disease incidence (%)	3	30	10	5.7735	0
Disease incidence (%)	4	50	18.3333	5.7735	1.66667
Disease incidence (%)	5	63.3333	21.6667	3.33333	1.66667
Disease incidence (%)	6	73.3333	23.3333	6.66667	3.33333
0	5	0		0	0	0
10	10	15		5	0	5
15	20	20		10	5	10
30	20	40		10	10	10
50	40	60		20	20	15
60	60	70		25	20	20
80	80	60		30	20	20
