# Supplementary material for: Efficacy of Saccharothrix algeriensis NRRL B-24137 to suppress Fusarium oxysporum f.sp. vasinfectum induced wilt disease in cotton
Source: PeerJ. 2023 Feb 6;11:e14754. doi: 10.7717/peerj.14754 (PMC9910192; doi:10.7717/peerj.14754)
Supplement: Supplemental Information 4 — Disease severity after different time interval. [file peerj-11-14754-s004.xlsx]

## Sheet: Fig.7
		G1	G2	G3
Leading Authors	0
	10
	10²
	10³
	104	79	61	47	7	6	3
	105	62	47	30	7	4.5	6
	106	39	31	20	5	3.5	3
	107	28.5	22.5	17.5	1	1	1
		G0
	0	4			0
	10
	102
	103
	104	58			4.5
	105	85			7
	106	92			7
	107
