# Supplementary material for: Efficacy of Saccharothrix algeriensis NRRL B-24137 to suppress Fusarium oxysporum f.sp. vasinfectum induced wilt disease in cotton
Source: PeerJ. 2023 Feb 6;11:e14754. doi: 10.7717/peerj.14754 (PMC9910192; doi:10.7717/peerj.14754)
Supplement: Supplemental Information 5 — Assessment of SA and FOV density in the soil. after one week. [file peerj-11-14754-s005.xlsx]

## Sheet: Fig.8
Time (weeks)	SA	FOV	FOV+SA	se3	se1	se2
3	0.29	0.23	0.125	0.00519615	0.00288675	0.00173205
5	0.083	0.221	0.102	0.00173205	0.0057735	0.00173205
7	0.048	0.175	0.051	0.0011547	0.00288675	0.0011547
9	0.046	0.167	0.0454333	0.0011547	0.00173205	0.00144491
