# Supplementary material for: Efficacy of Saccharothrix algeriensis NRRL B-24137 to suppress Fusarium oxysporum f.sp. vasinfectum induced wilt disease in cotton
Source: PeerJ. 2023 Feb 6;11:e14754. doi: 10.7717/peerj.14754 (PMC9910192; doi:10.7717/peerj.14754)
Supplement: Supplemental Information 6 — Population density from 3 to 9 weeks. [file peerj-11-14754-s006.xlsx]

## Sheet: Fig.9
Time (weeks)		Sterilzed	Non-sterilized		se4	se5
3		0.246	0.235		0.00404145	0.00635085
5		0.235	0.221		0.0057735	0.0069282
7		0.174	0.162		0.00173205	0.0034641
9		0.177	0.157		0.0046188	0.00173205
