# Supplementary material for: Efficacy of Saccharothrix algeriensis NRRL B-24137 to suppress Fusarium oxysporum f.sp. vasinfectum induced wilt disease in cotton
Source: PeerJ. 2023 Feb 6;11:e14754. doi: 10.7717/peerj.14754 (PMC9910192; doi:10.7717/peerj.14754)
Supplement: Supplemental Information 7 — Spore germination after 1 week. [file peerj-11-14754-s007.xlsx]

## Sheet: Sheet1
FOV	92.4
T1	55
T2	35
T3	23.33
T4	13.44
